# Supplementary material for: fMRI-based validation of continuous-wave fNIRS of supplementary motor area activation during motor execution and motor imagery
Source: PubMed Central journal article supplement (PMC8897516; doi:10.1038/s41598-022-06519-7), 2022-03-04
Supplement: 41598_2022_6519_MOESM1_ESM.pdf [file 41598_2022_6519_MOESM1_ESM.pdf]

## Supplementary Material

### A FINGER TAPPING TASK

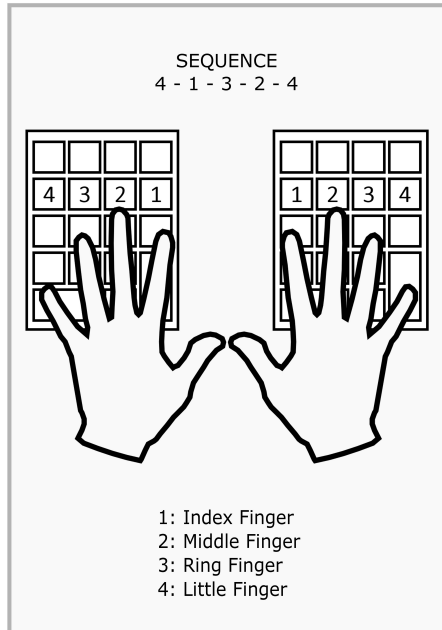

### B TASKS AND STIMULI

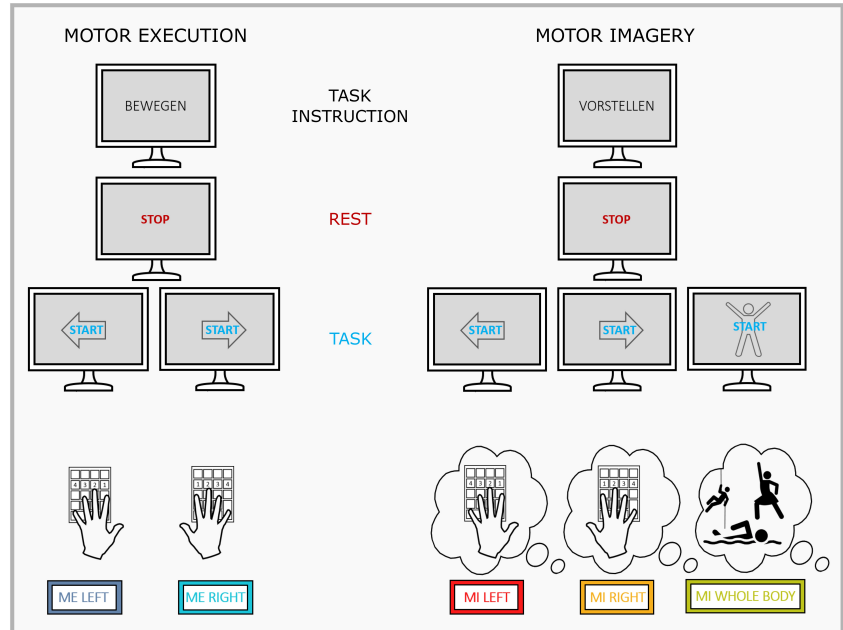

### C EXPERIMENTAL DESIGN

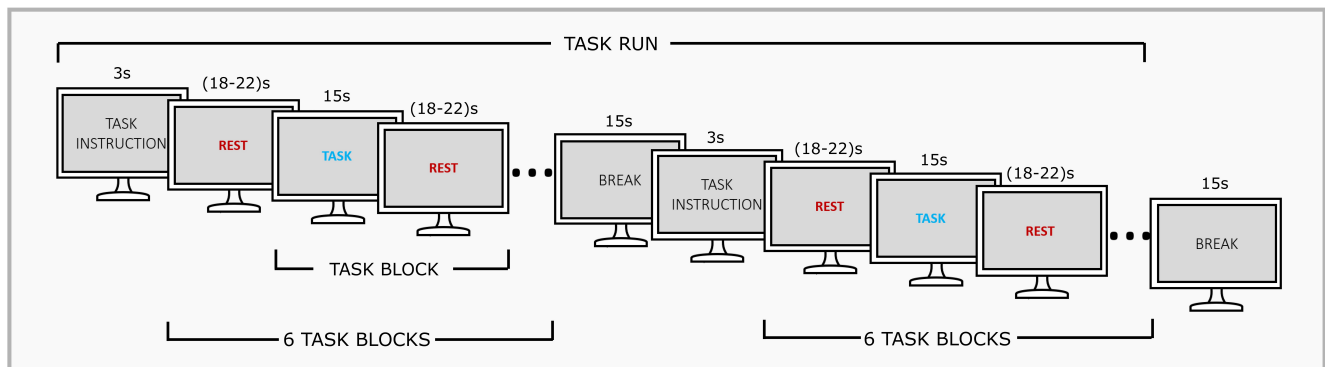

**Figure 1.** Schematic illustration of (A) the finger tapping task, (B) the stimuli of the respective tasks and (C) of the experimental design. (A) In order to type the sequence of the finger tapping task, the subjects were instructed that each finger of each hand corresponds to a specific number which should be used to press the respective key on a number pad. (B) tasks were either motor execution of left or right hand finger tapping (bottom left) or motor imagery of this task or a whole body movement (bottom right). The stimuli are shown in the upper part. At the beginning of each task run and after each break a task instruction indicated whether the following task is ME ('BEWEGEN') or MI ('VORSTELLEN'). The stimuli displayed whether the task was left or the right hand (ME and MI) or the whole body movement (MI only). (C) Each task run started with the task instruction (3s) and a rest period of 18-22s and consisted of 12 task blocks of 15s task period followed by 18-22s of rest period. After 6 task blocks a break of 15s duration was integrated.

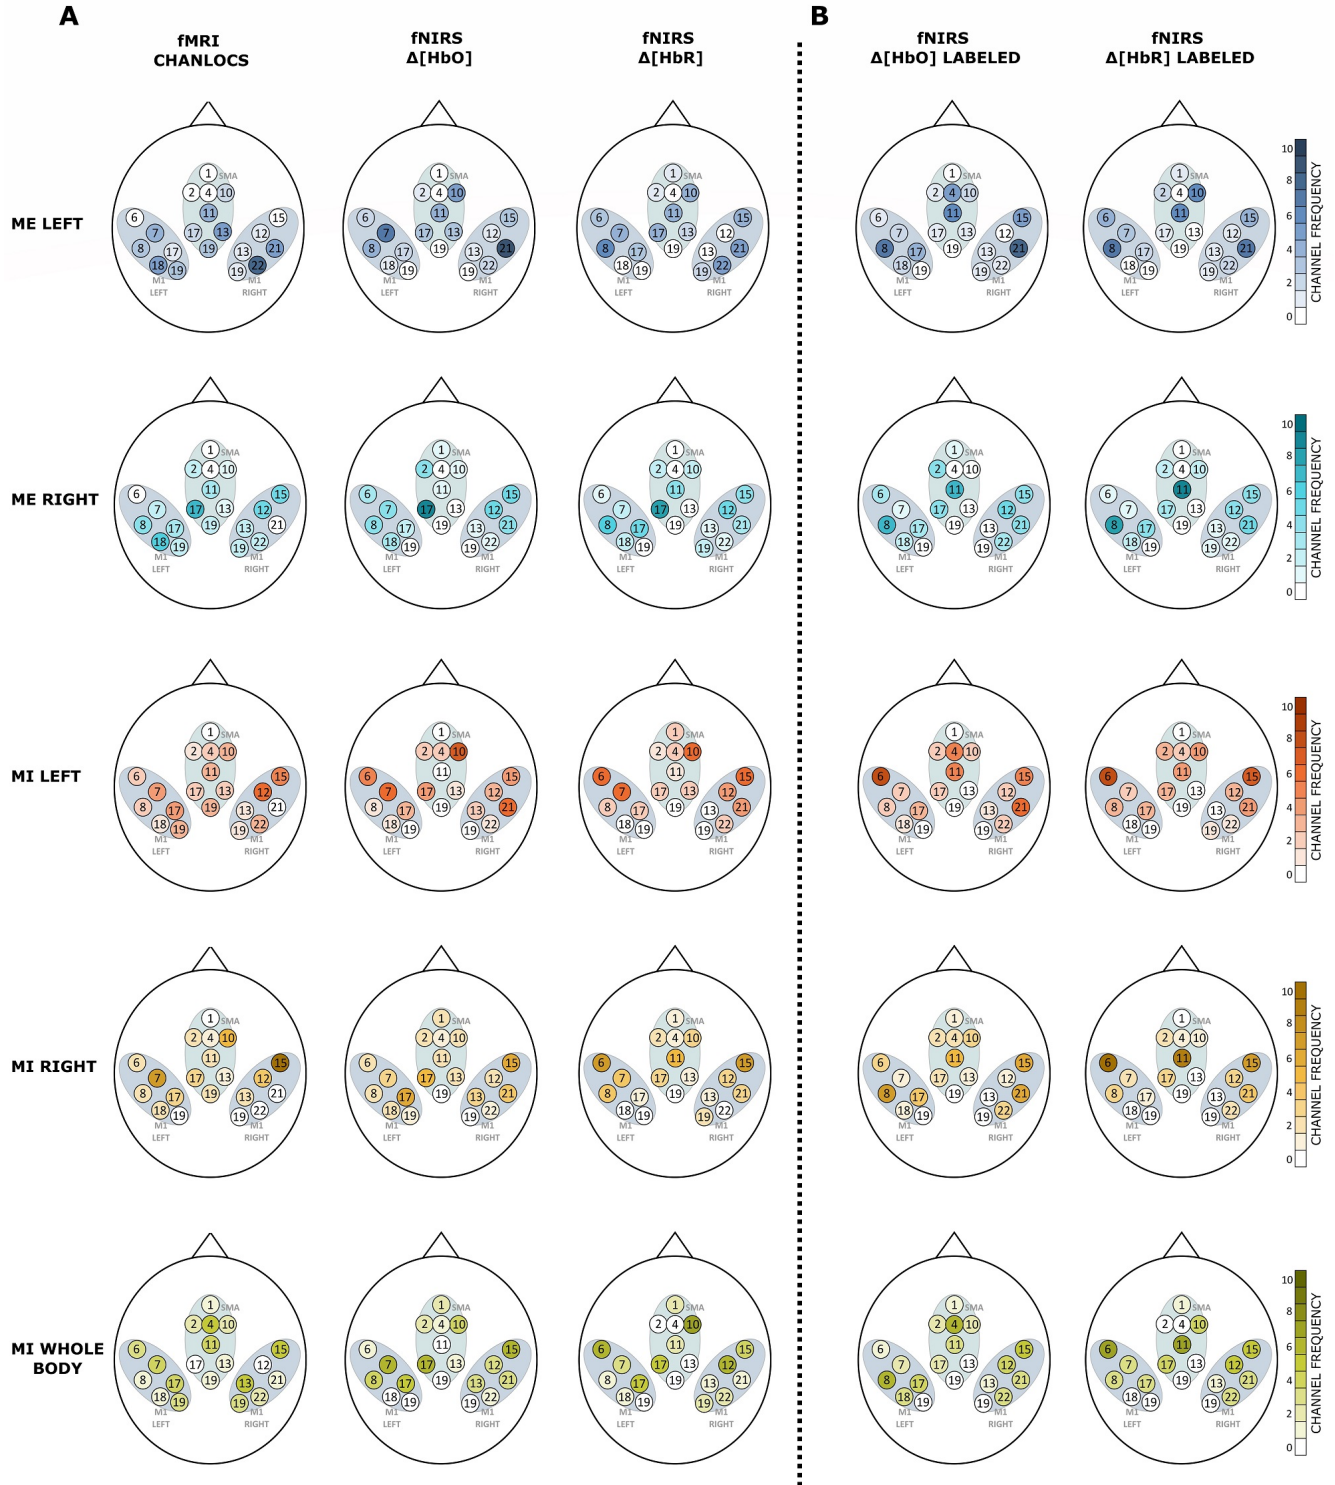

**Figure 2.** Channel selection frequency for data types (columns) and tasks (rows) split by ROI. Illustrated is how often a channel was selected across subjects for an ROI based on its beta value. Note that a subset of channels (13, 17, 19) belonged to more than one ROI and were therefore considered for selection several times. (A) Channel selection frequencies for data types fMRI CHANLOCS, fNIRS  $\Delta[HbO]$  and fNIRS  $\Delta[HbR]$ . (B) Channel selection frequencies for data types fNIRS  $\Delta[HbO]$  LABELED and fNIRS  $\Delta[HbR]$  LABELED. Color bars at the right end of each row apply for all five data types.

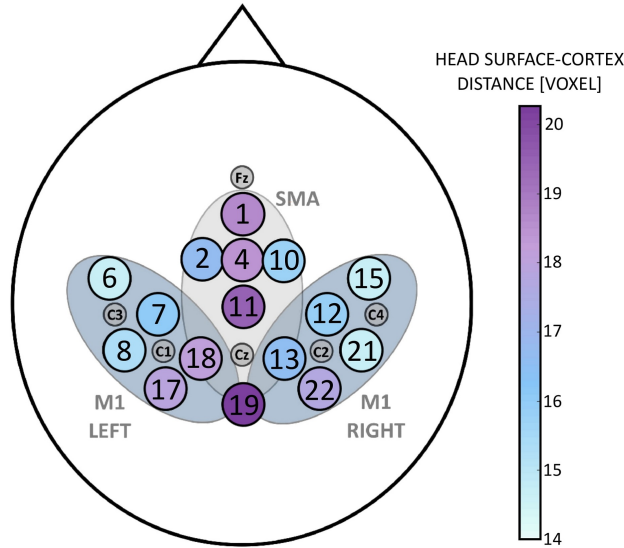

**Figure 3.** Visualisation of the distance between fNIRS channel position on the head surface and its projection to the cortex in voxel space. Each channels' distance incorporates the average distance across subjects. Darker colors indicate longer distances and brighter colors shorter distances. Voxel extraction is based on the head.nii file generated by AtlasViewer, therefore, a voxel has the size  $1 \times 1 \times 1$ mm.

**Table 1.** Table containing the fNIRS preprocessing steps in the correct order with all necessary inputs and variables.

| fNIRS Preprocessing Pipeline                                                                                        |                                                                                                                                                                                                                               |
|---------------------------------------------------------------------------------------------------------------------|-------------------------------------------------------------------------------------------------------------------------------------------------------------------------------------------------------------------------------|
| (1) Quality check using qt-nirs toolbox                                                                             | job = nirs.modules.QT;(qt-toolbox in NIRS toolbox)<br>job.sciThreshold = 0.6;<br>job.qThreshold = 0.65;                                                                                                                       |
| (2) Convert raw intensity data to changes of optical density                                                        | job = nirs.modules.OpticalDensity; (NIRS toolbox)                                                                                                                                                                             |
| (3) TDDR motion correction                                                                                          | job = nirs.modules.TDDR; (NIRS toolbox)<br>lpf_cutoff = 0.09;<br>hpf_cutoff = 0.01;<br>order = 1000;                                                                                                                          |
| (4) Apply band-pass filter                                                                                          | bpFilt = designfilt('bandpassfir', 'FilterOrder', order, ...<br>'CutoffFrequency1', hpf_cutoff, 'CutoffFrequency2', lpf_cutoff, ...<br>'SampleRate', dat.Fs);<br>bp_data = filtfilt(bpFilt, dat.data);<br>dat.data = bp_data; |
| (5) Channel Pruning: replace channels with bad quality detected in (1) with NaNs                                    | PVF = 1/60;                                                                                                                                                                                                                   |
| (6) Convert changes in optical density into hemoglobin concentration changes using mBLL                             | DPF = CalcDPF(age, [760 850]); (function from Scholkmann et al., 2013)<br>job = nirs.modules.BeerLambertLaw; (NIRS toolbox)<br>job.PPF = DPF.*PVF;                                                                            |
| (7) Apply systemic artifact correction using GLM in combination with all short distance channels; extract residuals |                                                                                                                                                                                                                               |

**Table 2.** Table containing the SPM12 fMRI preprocessing steps in the correct order with all necessary inputs and variables in order to run it in a SPM12 batch file.

| SPM12 Preprocessing Pipeline               |                     |
|--------------------------------------------|---------------------|
| <b>(1) Realign: Estimate &amp; Reslice</b> |                     |
| Data                                       | Functional Images   |
| . Session                                  |                     |
| Estimation Options                         |                     |
| . Quality                                  | 1                   |
| . Separation                               | 4                   |
| . Smoothing (FWHM)                         | 5                   |
| . Num Passes                               | Register to mean    |
| . Interpolation                            | 2nd Degree B-Spline |
| . Wrapping                                 | Wrap Y              |
| . Weighting                                | 0 files             |

|                                 |                                                                     |
|---------------------------------|---------------------------------------------------------------------|
| Reslice Options                 |                                                                     |
| . Resliced Images               | Mean Image Only                                                     |
| . Interpolation                 | 4th Degree B-Spline                                                 |
| . Wrapping                      | Wrap Y                                                              |
| . Masking                       | Mask images                                                         |
| . Filename Prefix               | r                                                                   |
| <hr/>                           |                                                                     |
| <b>(2) Coregister: Estimate</b> |                                                                     |
| Reference Image                 | DEP Realign: Estimate & Reslice: Mean Image                         |
| Source Image                    | Anatomical Image (T1)                                               |
| Other Images                    | -                                                                   |
| Estimation Options              |                                                                     |
| . Objective Function            | Normalised Mutual Information                                       |
| . Separation                    | [4 2]                                                               |
| . Tolerances                    | [0.02 0.02 0.02 0.001 0.001 0.001 0.01 0.01 0.01 0.001 0.001 0.001] |
| . Histogram Smoothing           | [7 7]                                                               |
| <hr/>                           |                                                                     |
| <b>(3) Coregister: Estimate</b> |                                                                     |
| Reference Image                 | ...\spm12\canonical\single_subj_T1.nii, 1                           |
| Source Image                    | DEP Coregister: Estimate: Coregistered Images                       |
|                                 | DEP                                                                 |
| Other Images                    | Realign: Estimate & Reslice: Realigned Images (Sess 1)              |
|                                 | Realign: Estimate & Reslice: Mean Image                             |
| Estimation Options              |                                                                     |
| . Objective Function            | Normalised Mutual Information                                       |
| . Separation                    | [4 2]                                                               |
| . Tolerances                    | [0.02 0.02 0.02 0.001 0.001 0.001 0.01 0.01 0.01 0.001 0.001 0.001] |
| . Histogram Smoothing           | [7 7]                                                               |
| <hr/>                           |                                                                     |
| <b>(4) Segment</b>              |                                                                     |
| Data                            |                                                                     |
| . Channel                       |                                                                     |
| . . Volumes                     | DEP Coregister: Estimate: Coregistered Images                       |
| . . Bias regularisation         | light regularisation (0.001)                                        |
| . . Bias FWHM                   | 60 mm cutoff                                                        |
| . . Save Bias Corrected         | Save Bias Corrected                                                 |
| Tissues                         |                                                                     |
| . Tissue                        |                                                                     |
| . . Tissue probability map      | ...\spm12\tpm\TPM.nii, 1                                            |
| . . Num. Gaussians              | 1                                                                   |
| . . Native Tissue               | Native Space                                                        |
| . . Warped Tissue               | None                                                                |
| . Tissue                        |                                                                     |
| . . Tissue probability map      | ...\spm12\tpm\TPM.nii, 2                                            |
| . . Num. Gaussians              | 1                                                                   |
| . . Native Tissue               | Native Space                                                        |
| . . Warped Tissue               | None                                                                |
| . Tissue                        |                                                                     |
| . . Tissue probability map      | ...\spm12\tpm\TPM.nii, 3                                            |
| . . Num. Gaussians              | 2                                                                   |
| . . Native Tissue               | Native Space                                                        |
| . . Warped Tissue               | None                                                                |
| . Tissue                        |                                                                     |
| . . Tissue probability map      | ...\spm12\tpm\TPM.nii, 4                                            |
| . . Num. Gaussians              | 3                                                                   |
| . . Native Tissue               | Native Space                                                        |
| . . Warped Tissue               | None                                                                |
| . Tissue                        |                                                                     |
| . . Tissue probability map      | ...\spm12\tpm\TPM.nii, 5                                            |
| . . Num. Gaussians              | 4                                                                   |
| . . Native Tissue               | Native Space                                                        |
| . . Warped Tissue               | None                                                                |
| . Tissue                        |                                                                     |
| . . Tissue probability map      | ...\spm12\tpm\TPM.nii, 6                                            |
| . . Num. Gaussians              | 2                                                                   |
| . . Native Tissue               | None                                                                |
| . . Warped Tissue               | None                                                                |
| Warping & MRF                   |                                                                     |
| . MRF Parameter                 | 1                                                                   |
| . Clean Up                      | Light Clean                                                         |
| . Warping Regularisation        | [0 0.001 0.5 0.05 0.2]                                              |
| . Affine Regularisation         | ICBM space template - European brains                               |

|                             |                                                                                                   |
|-----------------------------|---------------------------------------------------------------------------------------------------|
| . Smoothness                | 0                                                                                                 |
| . Sampling distance         | 3                                                                                                 |
| . Deformation Fields        | Forward                                                                                           |
| <hr/>                       |                                                                                                   |
| <b>(5) Normalise: Write</b> |                                                                                                   |
| Data                        |                                                                                                   |
| . Subject                   |                                                                                                   |
| . . Deformation Field       | DEP Segment: Forward Deformations<br>DEP                                                          |
| . . Images to Write         | Realign: Estimate & Reslice: Realigned Images (Sess 1)<br>Realign: Estimate & Reslice: Mean Image |
| Writing Options             |                                                                                                   |
| . Bounding box              | [-78 -112 -70; 78 76 85]                                                                          |
| . Voxel sizes               | [2 2 2]                                                                                           |
| . Interpolation             | 4th Degree B-Spline                                                                               |
| . Filename Prefix           | w                                                                                                 |
| <hr/>                       |                                                                                                   |
| <b>(6) Normalise: Write</b> |                                                                                                   |
| Data                        |                                                                                                   |
| . Subject                   |                                                                                                   |
| . . Deformation Field       | DEP Segment: Forward Deformations<br>DEP                                                          |
| . . Images to Write         | Coregister: Estimate: Coregistered Images<br>Segment: Bias Corrected (1)                          |
| Writing Options             |                                                                                                   |
| . Bounding box              | [-78 -112 -70; 78 76 85]                                                                          |
| . Voxel sizes               | [1 1 1]                                                                                           |
| . Interpolation             | 4th Degree B-Spline                                                                               |
| . Filename Prefix           | w                                                                                                 |
| <hr/>                       |                                                                                                   |
| <b>(7) Smooth</b>           |                                                                                                   |
| Images to smooth            | DEP Normalise: Write: Normalised Images (Subj 1)                                                  |
| FWHM                        | [8 8 8]                                                                                           |
| Data Type                   | SAME                                                                                              |
| Implicit Masking            | No                                                                                                |
| Filename Prefix             | s                                                                                                 |
| <hr/>                       |                                                                                                   |
